# Supplementary material for: MiR-124-3p impedes the metastasis of non-small cell lung cancer via extracellular exosome transport and intracellular PI3K/AKT signaling
Source: PubMed Central journal article supplement (PMC9811783; doi:10.1186/s40364-022-00441-w), 2023-01-04
Supplement: 40364_2022_441_MOESM1_ESM.pdf [file 40364_2022_441_MOESM1_ESM.pdf]

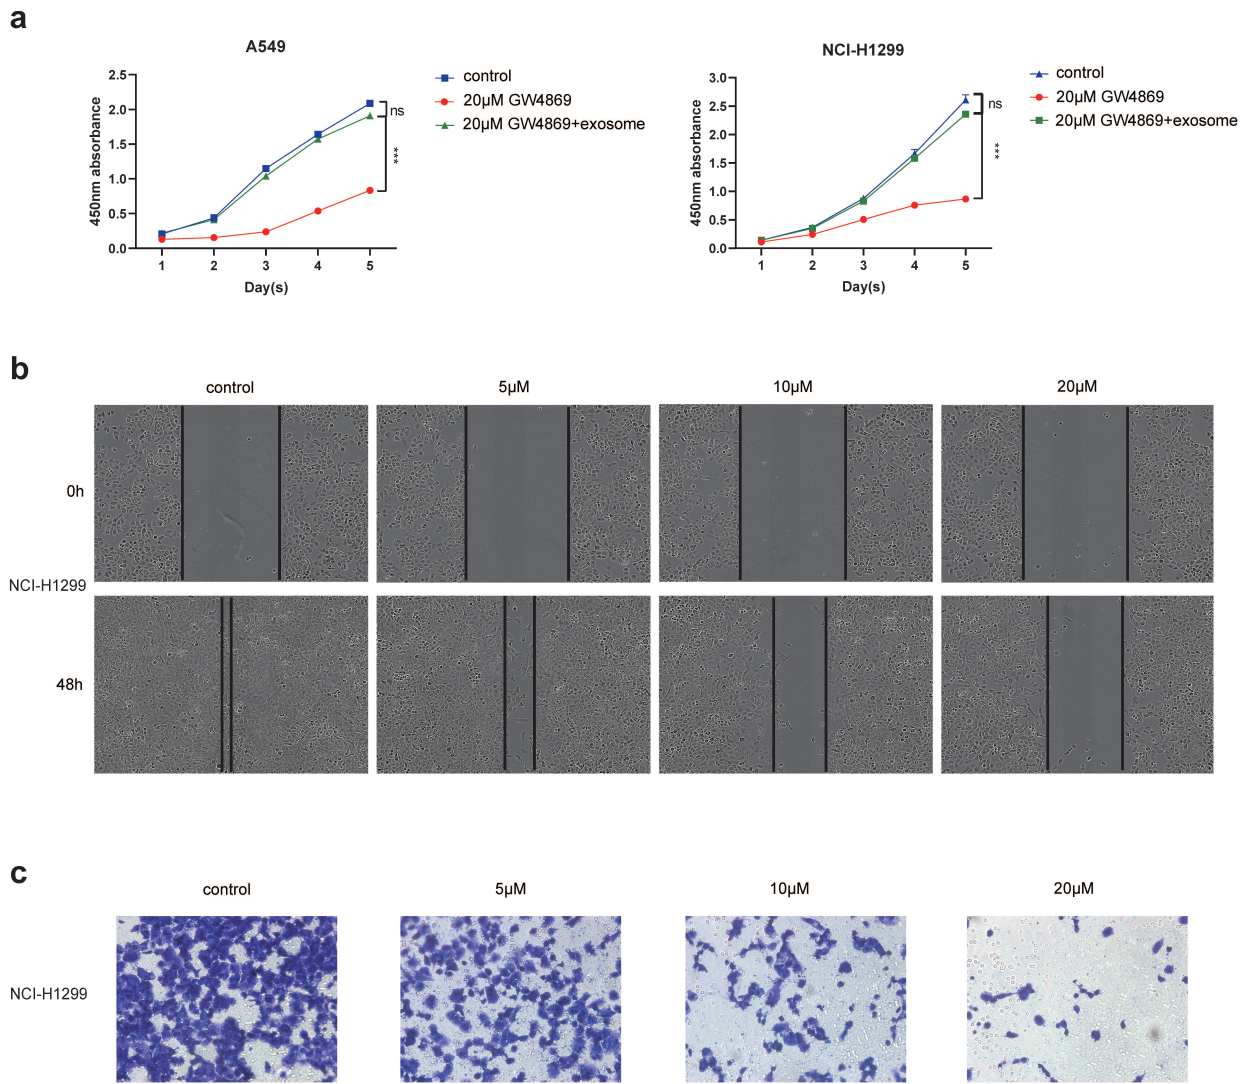

**Figure S1. GW4869 inhibits NSCLC cells proliferation, invasion and migration through inhibition of exosome secretion.**

**(a)** Growth curve of NSCLC cells treated with 20µM GW4869 and 20µM GW4869+exosome. **(b)** Images of wound healing assays of NCI-1299 cells transfected with different concentrations of GW4869. **(c)** Images of transwell assays performed in NCI-H1299 cells transfected with different concentrations of GW4869. Data are shown as the mean  $\pm$  SD. \*P < 0.01, \*\*P < 0.001, \*\*\*P < 0.0001, and \*\*\*\*P < 0.00001.

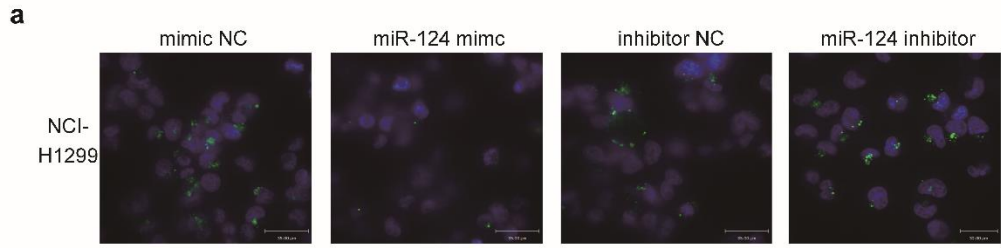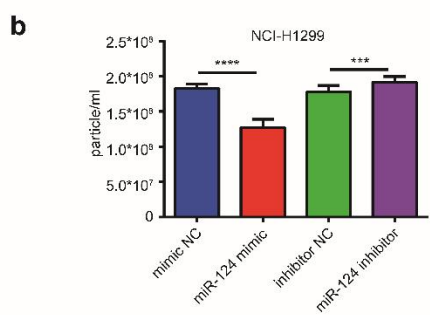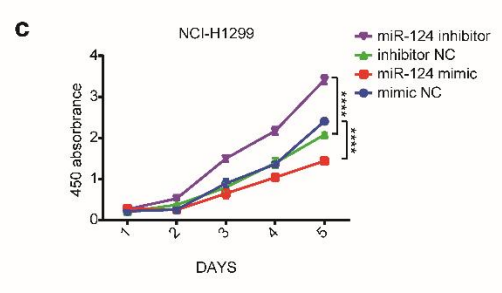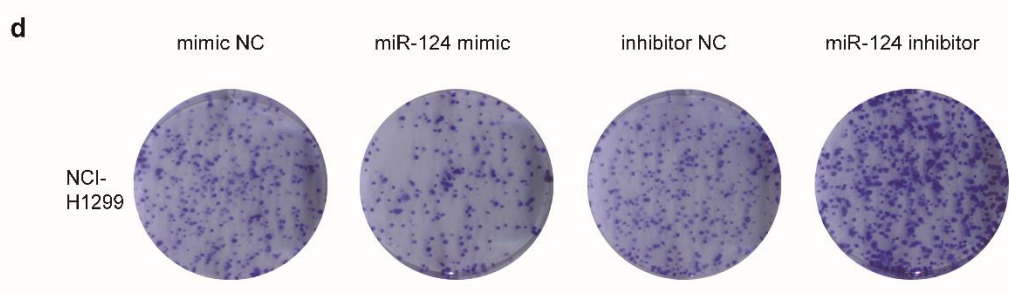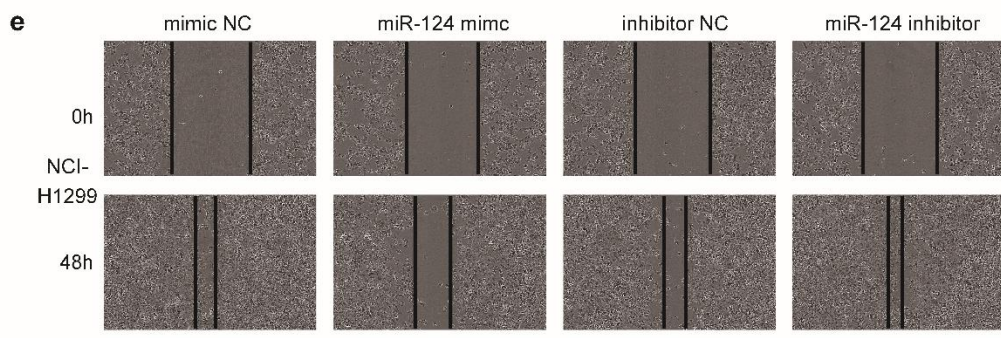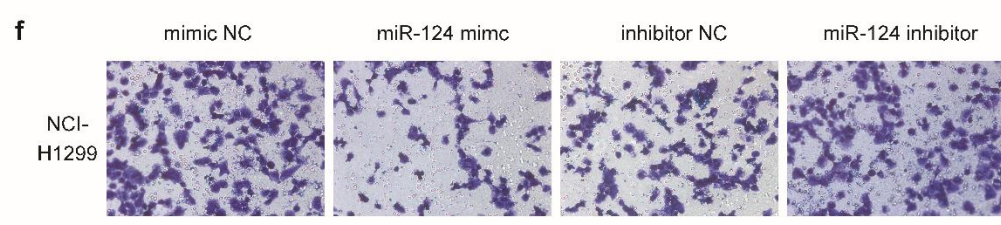

**Figure S2. miR-124-3p inhibits exosome secretion, uptake and migratory abilities of NCI-H1299 cells**

**(a)** Concentration of exosomes in medium from A549 cells transfected with miR-124-3p mimic or inhibitor. **(b)** Images of the uptake of exosomes fluorescently labeled with PKH67 (green) by A549 after incubation for 24 hours. Images were acquired under confocal microscopy. **(c)** Growth curves generated with OD450 data with the CCK8 assay for A549 cells transfected with miR-124-3p mimic or inhibitor. **(d)** Images of colony forming assays for A549 cells transfected with miR-124-3p mimic or inhibitor. Cells were fixed and stained with crystal violet. **(e)** Images of wound healing assays of A549 cells transfected with miR-124-3p mimic or inhibitor. **(f)** Images of transwell assays performed with A549 cells transfected with miR-124-3p mimic or inhibitor. Cells were fixed and stained with crystal violet. Data are shown as the mean  $\pm$  SD. \* $P < 0.01$ , \*\* $P < 0.001$ , \*\*\* $P < 0.0001$ , and \*\*\*\* $P < 0.00001$ .

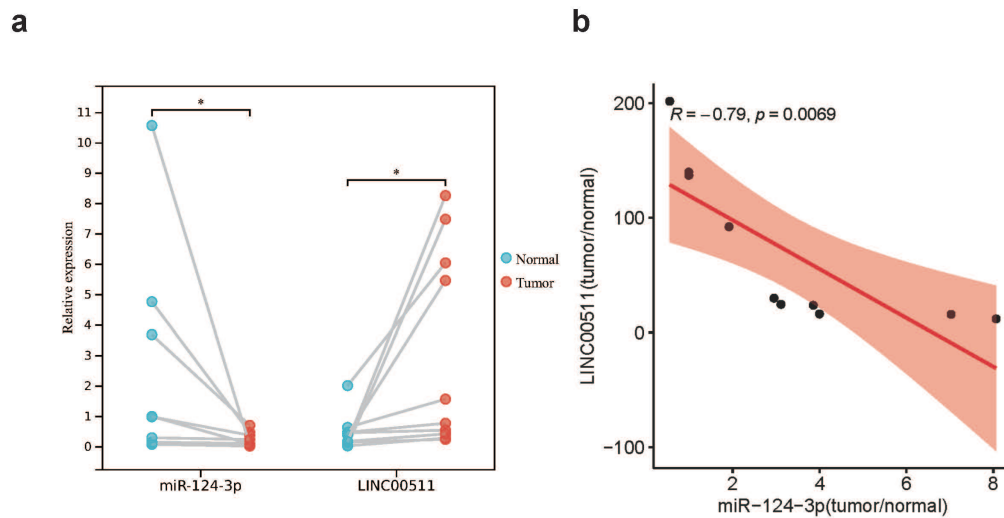

**Figure S3. The correlation between miR-124-3p and LINC00511**

**(a)** The relative expression of miR-124-3p and LINC00511 in normal or tumor tissues of NSCLC. **(b)** Images of the correlation analysis between miR-124-3p and LINC00511 in NSCLC. Data are shown as the mean  $\pm$  SD. \* $P < 0.01$ , \*\* $P < 0.001$ , \*\*\* $P < 0.0001$ , and \*\*\*\* $P < 0.00001$ .

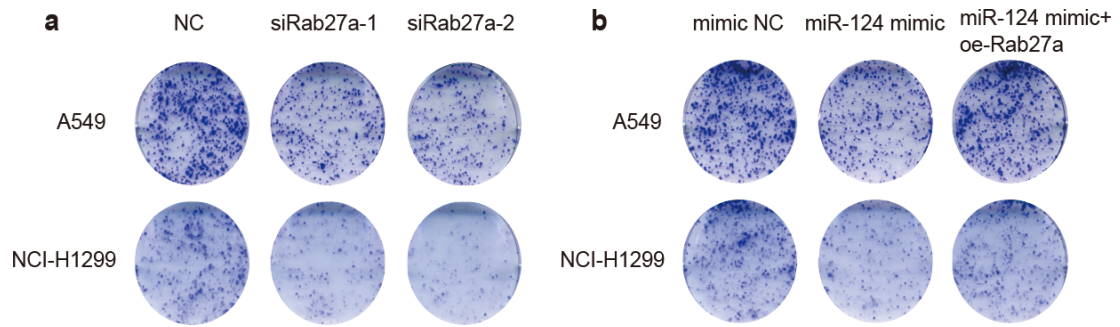

**Figure S4. *miR-124-3p* inhibits tumor proliferation by targeting *Rab27a***

**(a)** Images of colony formation assays performed on A549 and NCI-H1299 cells transfected with siRNA against *Rab27a*, si-*Rab27a*. **(b)** Images of colony forming assays performed on A549 and NCI-H1299 cells transfected with miR-124-3p mimic or miR-124-3p mimic + oe-*Rab27a*.
