# Supplementary material for: MiR-124-3p impedes the metastasis of non-small cell lung cancer via extracellular exosome transport and intracellular PI3K/AKT signaling
Source: PubMed Central journal article supplement (PMC9811783; doi:10.1186/s40364-022-00441-w), 2023-01-04

# Original images for Western Blots

Figure 1c

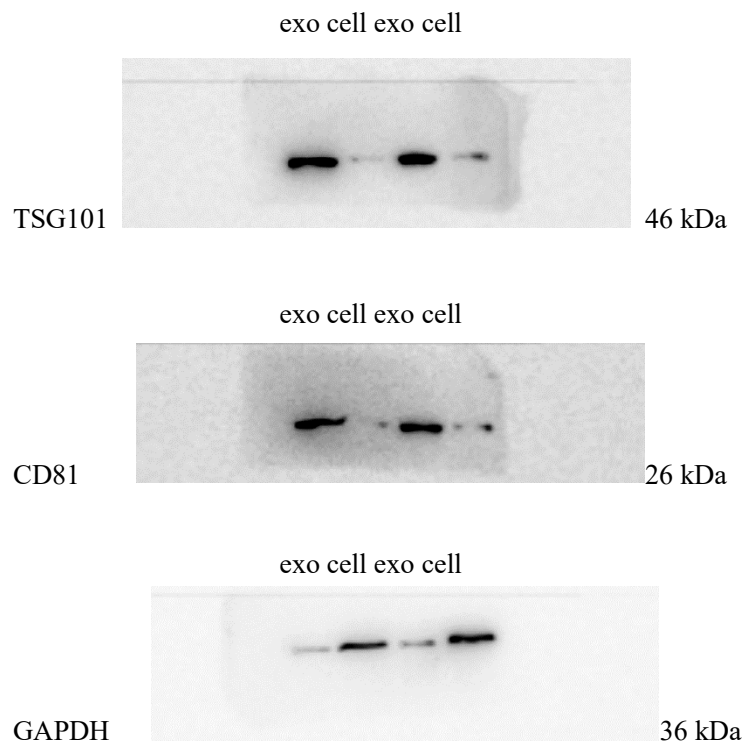

Figure 4d

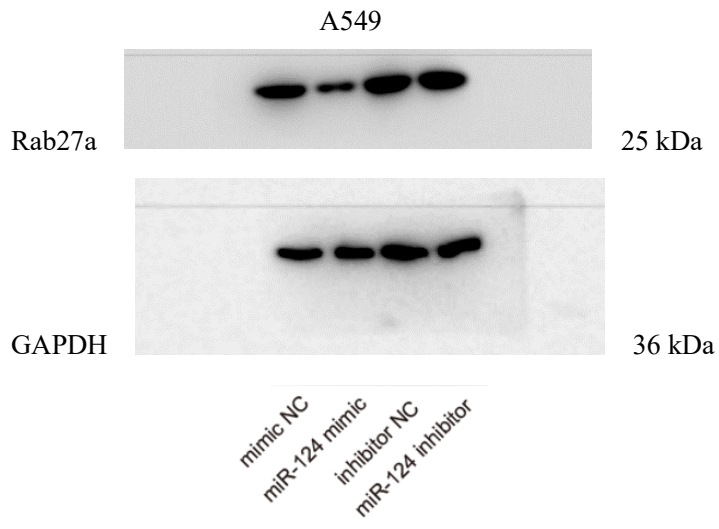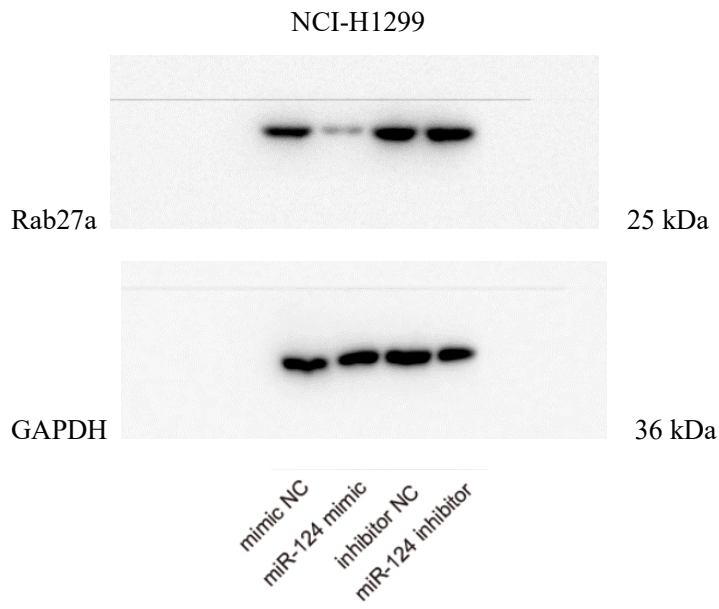

Figure 5f

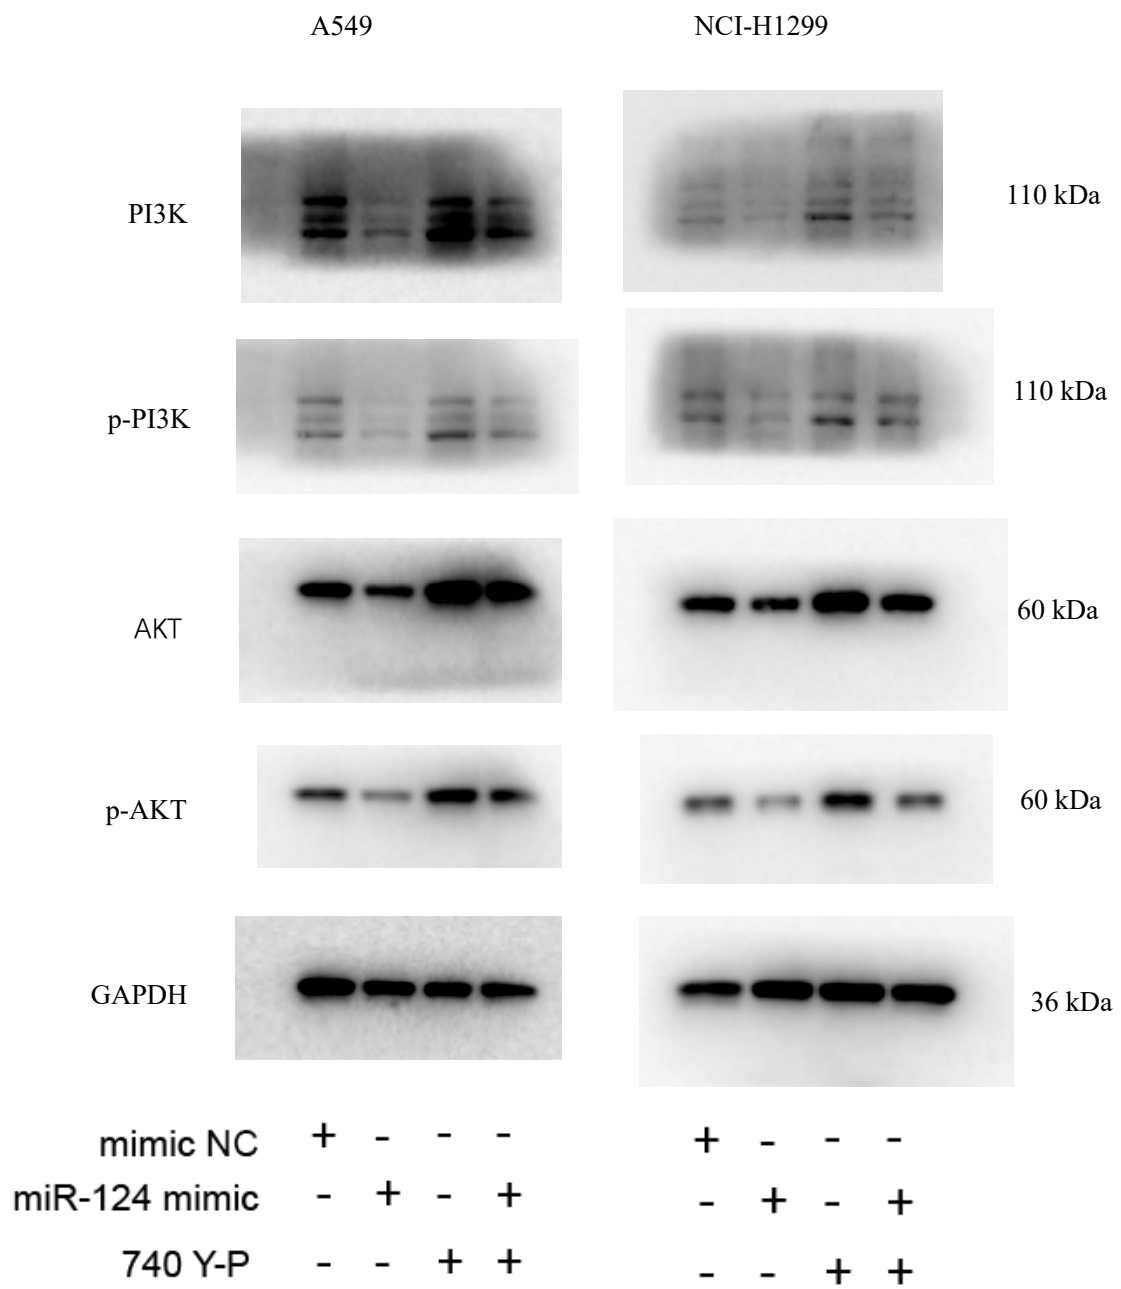

Supplement: 40364_2022_441_MOESM3_ESM.pdf [file 40364_2022_441_MOESM3_ESM.pdf]
